# Supplementary material for: Advanced Stimuli-Responsive Structure Based on 4D Aerogel and Covalent Organic Frameworks Composite for Rapid Reduction in Tetracycline Pollution
Source: MDPI journal article supplement (doi:10.3390/molecules28145505), 2023-07-19
Supplement: s1 [file s1]

## Supporting Information

### **Advanced Stimuli-Responsive Structure Based on 4D Aerogel and Covalent Organic Frameworks Composite for Rapid Reduction in Tetracycline Pollution**

Wenxin Wang <sup>1</sup>, Wenjing Wang <sup>1</sup>, Ying Liang <sup>1</sup>, Liwen Du <sup>1</sup>, Huan Yang <sup>2</sup>, Haoxiang Ma <sup>3</sup>, Huiting Cheng <sup>1</sup>, Yaqian Yan <sup>1</sup>, Yijun Shen <sup>1,\*</sup> and Qi Chen <sup>1,\*</sup>

<sup>1</sup> State Key Laboratory of Marine Resource Utilization in South China Sea, Collaborative Innovation Center of Marine Science and Technology, Hainan University, Haikou, 570228, China

<sup>2</sup> School of Materials Science and Engineering, Hainan University, Haikou, 570228, China

<sup>3</sup> Deep Sea Engineering Division, Institute of Deep Sea Science and Engineering, Chinese Academy of Sciences, Sanya, 572000, China

\* Correspondence: sheny2000@hainanu.edu.cn (Y. J. Shen), chenqi@hainanu.edu.cn (Q. Chen)

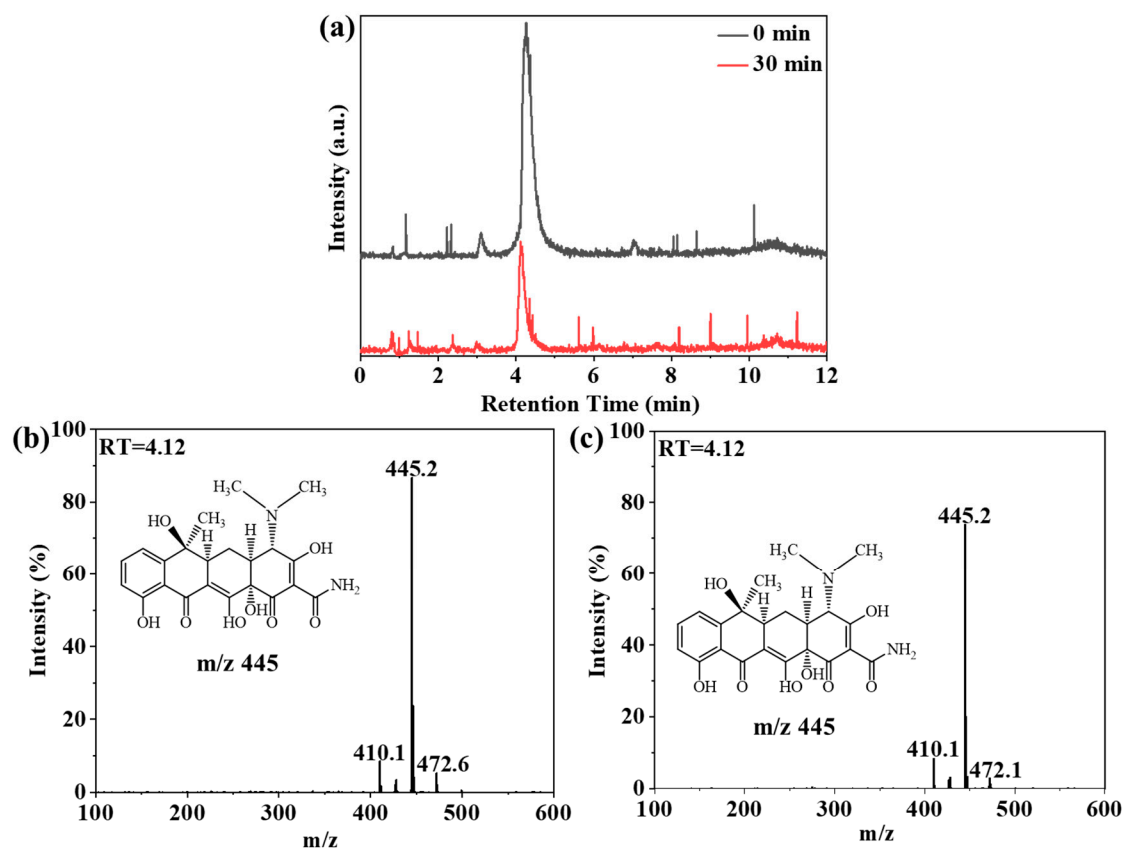

**Figure S1.** (a) Liquid chromatograms of photo-catalytic degradation of TC in the presence of the COF-1/BiPO<sub>4</sub> for different photo-catalytic reaction times: 0 min and 30 min. Mass spectra at retention time (RT) = 4.12 min for photo-catalytic degradation of TC in the presence of the COF-1/BiPO<sub>4</sub>: (b) photo-catalytic reaction times 0 min and (c) photo-catalytic reaction times 30 min.

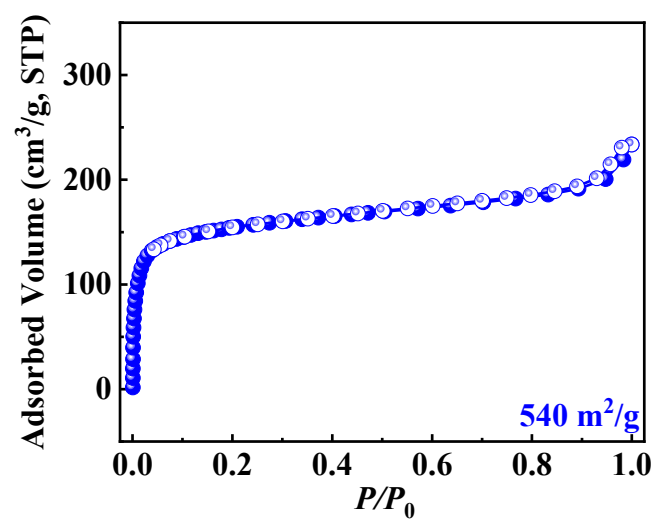

**Figure S2.** N<sub>2</sub> adsorption-desorption isotherms of COF-1.

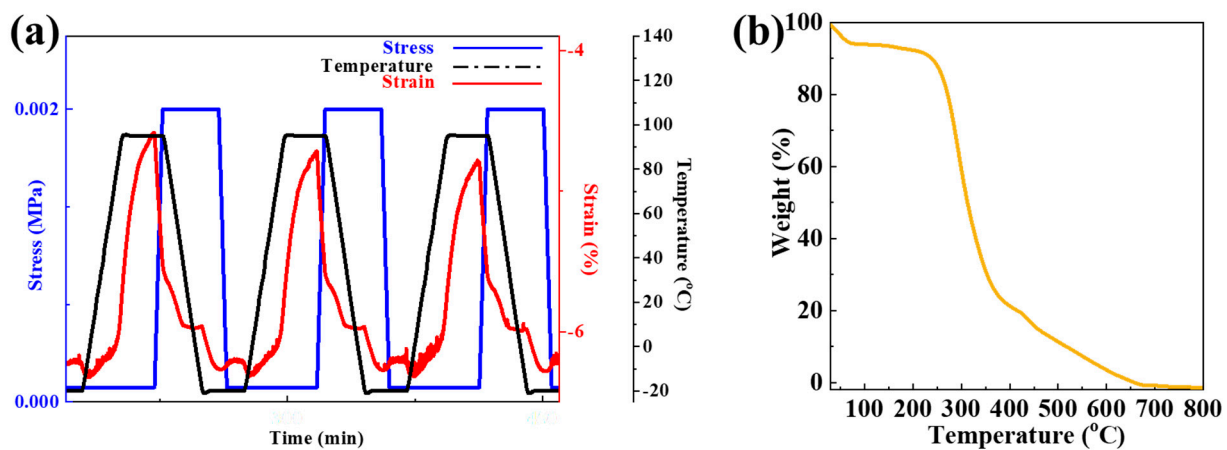

**Figure S3.** (a) Cyclic thermodynamic compression experiment and (b) TGA curve of P4D.

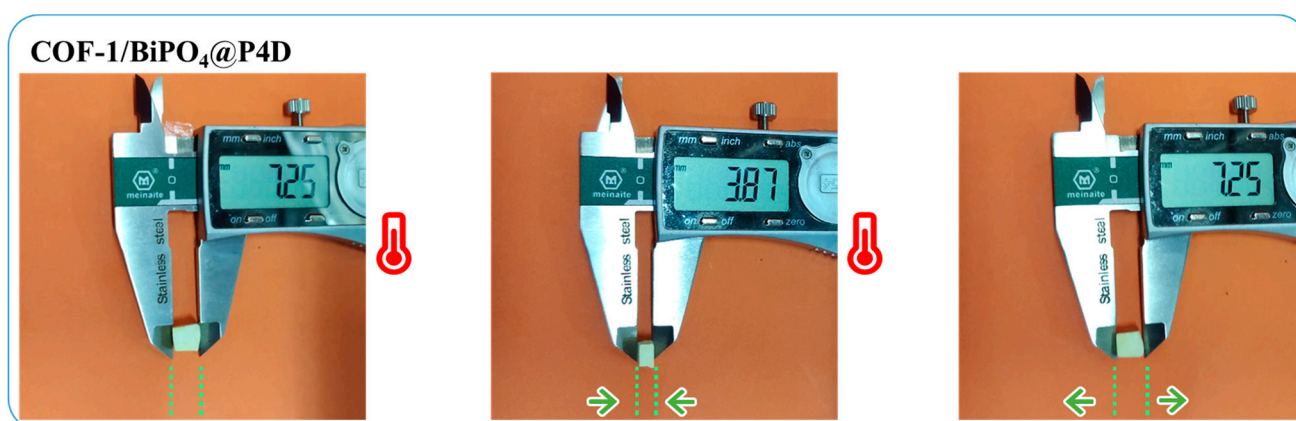

**Figure S4.** Thermal-induced shape memory process of COF-1/BiPO<sub>4</sub>@P4D.

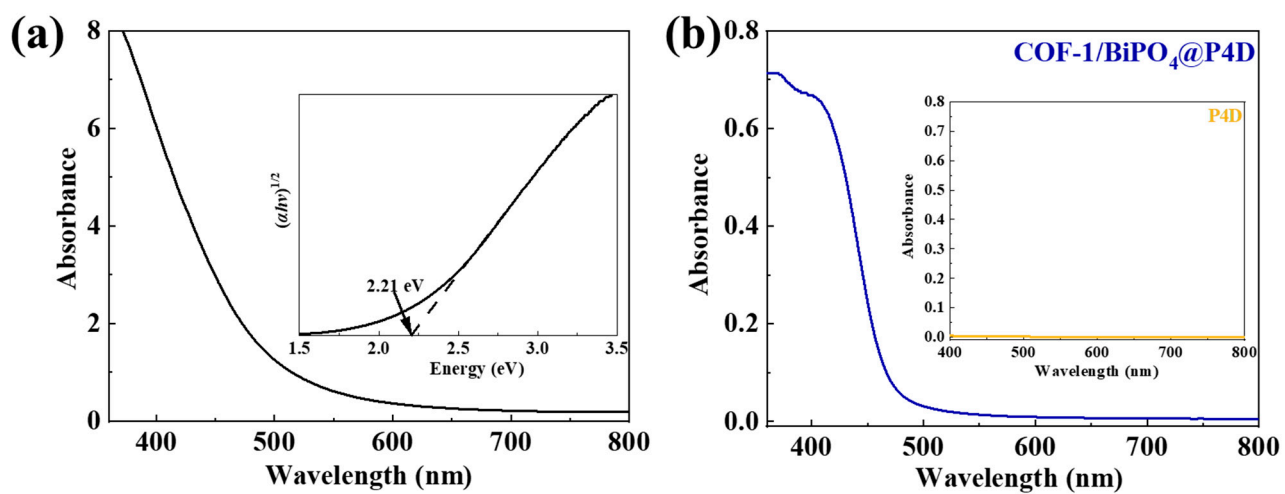

**Figure S5.** The optical property of (a) the COF-1/BiPO<sub>4</sub> and (b) COF-1/BiPO<sub>4</sub>@P4D (illustration is DRS of P4D).

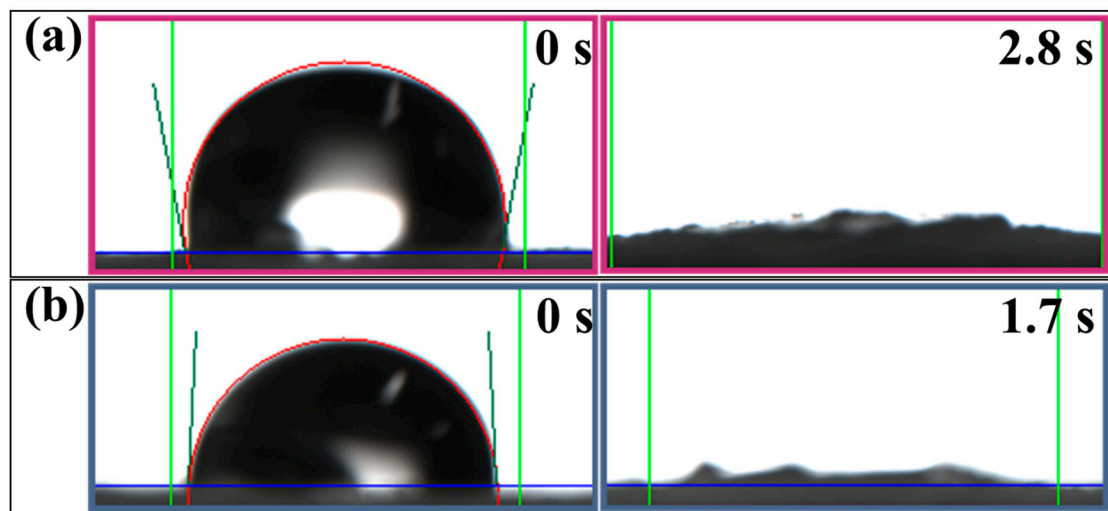

**Figure S6.** (a) The contact angel images of P4D at 0 s and 2.8 s after touching with water drop, respectively. (b) The contact angel images of COF-1/BiPO<sub>4</sub>@P4D at 0 s and 1.7 s after touching with water drop, respectively.

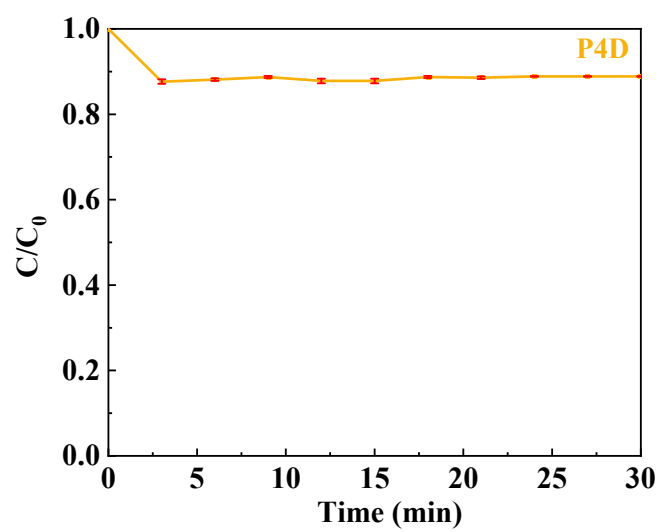

**Figure S7.** The P4D of the pre-fixed temporary compressed shape to reduce TC pollution ratio curve.
