# Supplementary material for: Advanced Stimuli-Responsive Structure Based on 4D Aerogel and Covalent Organic Frameworks Composite for Rapid Reduction in Tetracycline Pollution
Source: Molecules. 2023 Jul 19;28(14):5505. doi: 10.3390/molecules28145505 (PMC10386521; doi:10.3390/molecules28145505)
Supplement: Supplementary file 1 [file molecules-28-05505-s001.zip]

Archive with 5 entries (5 files):
- Movie S1 Rapid adsorption dye during stimuli-responsive recover process in the water.mp4
- Movie S2 The stimuli-responsive recover process of P4D in the water at room temperature.mp4
- Movie S3 The stimuli-responsive recover process of COF-1BiPO4@P4D in the water at room temperature.mp4
- Movie S4 Thermal-induced shape memory process.mp4
- Supplemental figrues.pdf
